# Supplementary Information: Flexible Learning-Free Segmentation and Reconstruction for Sparse Neuronal Circuit Tracing

Ali Shahbazi<sup>1,+</sup>, Jeffery Kinnison<sup>1,2,+</sup>, Rafael Vescovi<sup>2,3</sup>, Ming Du<sup>4</sup>, Robert Hill<sup>5</sup>, Maximilian Jösch<sup>6</sup>, Marc Takeno<sup>7</sup>, Hongkui Zeng<sup>7</sup>, Nuno Maçarico da Costa<sup>7</sup>, Jaime Grutzendler<sup>5</sup>, Narayanan Kasthuri<sup>2,3</sup>, and Walter J. Scheirer<sup>1,\*</sup>

<sup>1</sup>Department of Computer Science and Engineering, University of Notre Dame, Notre Dame, IN, USA

<sup>2</sup>Center for Nanoscale Materials, Argonne National Laboratory, Lemont, IL, USA

<sup>3</sup>Department of Neurobiology, University of Chicago, Chicago, IL, USA

<sup>4</sup>Department of Materials Science and Engineering, Northwestern University, Evanston, IL, USA

<sup>5</sup>Department of Neurology, Yale University, New Haven, CT, USA

<sup>6</sup>Neuroethology Group, IST Austria, Klosterneuburg, Austria

<sup>7</sup>Allen Institute for Brain Science, Seattle, WA, USA

\*walter.scheirer@nd.edu

+These authors contributed equally to this work.

## ABSTRACT

This document contains all supplemental figures and methods descriptions.

## Supplementary Methods: Evaluation Metrics

In our experiments we compared our EM reconstructions and one of our  $\mu$ CT X-ray stacks against expert annotated ground-truth. Since 3D reconstruction is the goal of the work, we chose Hausdorff distance as an evaluation tool. It is a well-known evaluation method for 3D meshes and reconstructions<sup>1</sup>. Instead of one-by-one matching as is done when calculating variation of information, which checks the location of each point on the first model with a similar location on second model, Hausdorff distance considers many-to-many correspondence. Consider a 3D reconstruction  $A$  and corresponding 3D ground-truth  $B$ :  $A = \{a_1, a_2, \dots, a_n\}$  and  $B = \{b_1, b_2, \dots, b_n\}$ . The Hausdorff distance from  $A$  to  $B$  will be  $\delta_H(A, B) = \max_{a \in A} \min_{b \in B} \|a - b\|$ . Throughout this article, we use the convention  $A$  is in  $X/Y$  of the distance of  $B$ . Thus when we say  $A$  is in 1/1000 of the distance of  $B$ , this means the average distance between  $A$  and  $B$  is less than 0.001.

## Supplementary Methods: 3D U-Net Training

For  $\mu$ CT X-ray segmentation, a standard 3D U-Net model<sup>2</sup> was trained on the manual segmentation of the SRB dataset<sup>3</sup>, which consists of a  $300 \times 300 \times 100$  voxel volume. Due to memory constraints, each training batch consisted of a single  $256 \times 256 \times 19$  block augmented by randomized rotation, transpose, and grayscale intensity scaling. The model was trained for 60 epochs using weighted mean-squared error loss and the Adam optimizer<sup>4</sup> with a learning rate of  $1 \times 10^{-4}$ . Training for sSEM APEX2-positive SAC segmentation proceeded using the same protocol, however the model was trained on manual segmentations created by Jösch *et al.*<sup>5</sup>.

**Supplementary Table S 1.** Running time comparison to the previous version of the pipeline<sup>5</sup>.

| Method                           | Running time |
|----------------------------------|--------------|
| Jösch <i>et al.</i> <sup>5</sup> | 136 min      |
| 2D FLoRIN                        | 24.82 min    |
| 3D U-Net                         | 3559.3 min   |

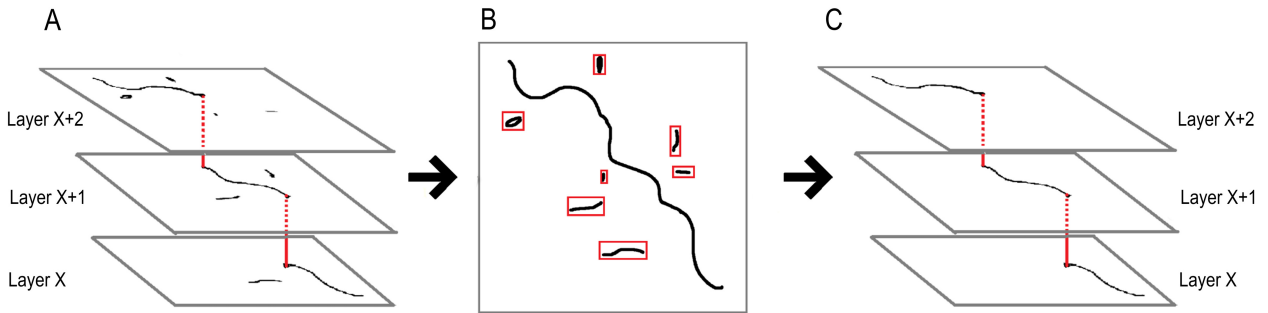

**Supplementary Figure S 1.** The 2D Identification process in FLoRIN first registers all connected components discovered in the Identification stage into a single plane. Connections are preserved by connecting components that overlap with one another in 2D, and unconnected components are discarded. The remaining components are then placed into a 3D volume.

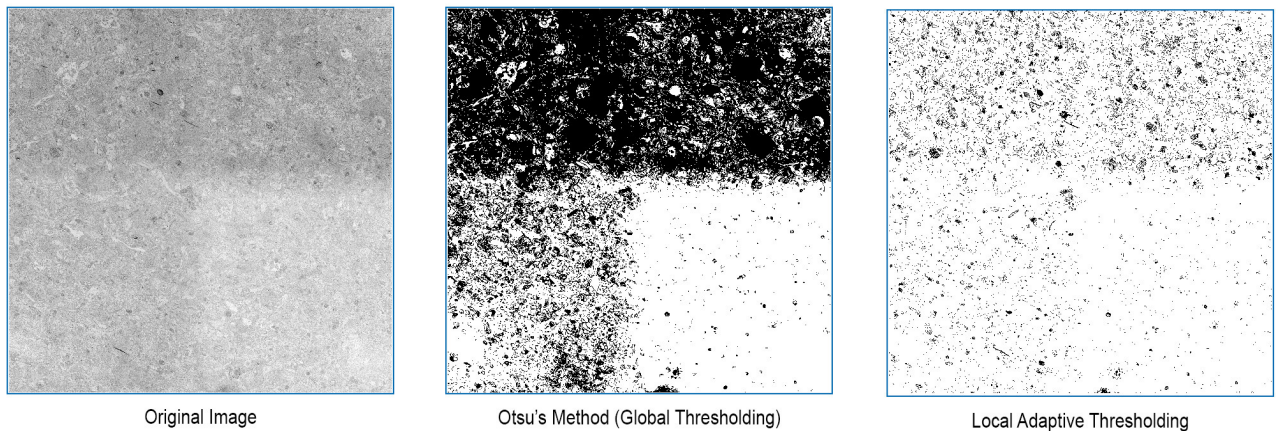

**Supplementary Figure S 2.** A comparison of the performance of global versus local thresholding methods on a noisy image. (Left) Neural images are often subject to large shifts in the grayscale distribution that can hamper reconstruction efforts. (Center) Otsu's method<sup>6</sup> binarizes images using a global threshold value, however due to grayscale shifts the binarization includes large portions of the image background. (Right) Our LAT algorithm operates by observing a local neighborhood around each voxel to reduce the impact of distant noise. In this case, LAT captures more of the features of interest despite large grayscale shifts.

## References

1. Aspert, N., Santa-Cruz, D. & Ebrahimi, T. Mesh: Measuring errors between surfaces using the hausdorff distance. In *Multimedia and Expo, 2002. ICME'02. Proceedings. 2002 IEEE International Conference on*, vol. 1, 705–708 (IEEE, 2002).
2. Çiçek, Ö., Abdulkadir, A., Lienkamp, S. S., Brox, T. & Ronneberger, O. 3d u-net: learning dense volumetric segmentation from sparse annotation. In *International Conference on Medical Image Computing and Computer-Assisted Intervention*, 424–432 (Springer, 2016).
3. Dyer, E. L. *et al.* Quantifying mesoscale neuroanatomy using x-ray microtomography. *eNeuro* **4**, ENEURO–0195 (2017).
4. Kingma, D. P. & Ba, J. Adam: A method for stochastic optimization. *arXiv preprint arXiv:1412.6980* (2014).
5. Joesch, M. *et al.* Reconstruction of genetically identified neurons imaged by serial-section electron microscopy. *eLife* **5**, e15015 (2016).
6. Otsu, N. A threshold selection method from gray-level histograms. *IEEE Transactions on Syst. Man, Cybern.* **9**, 62–66 (1979).

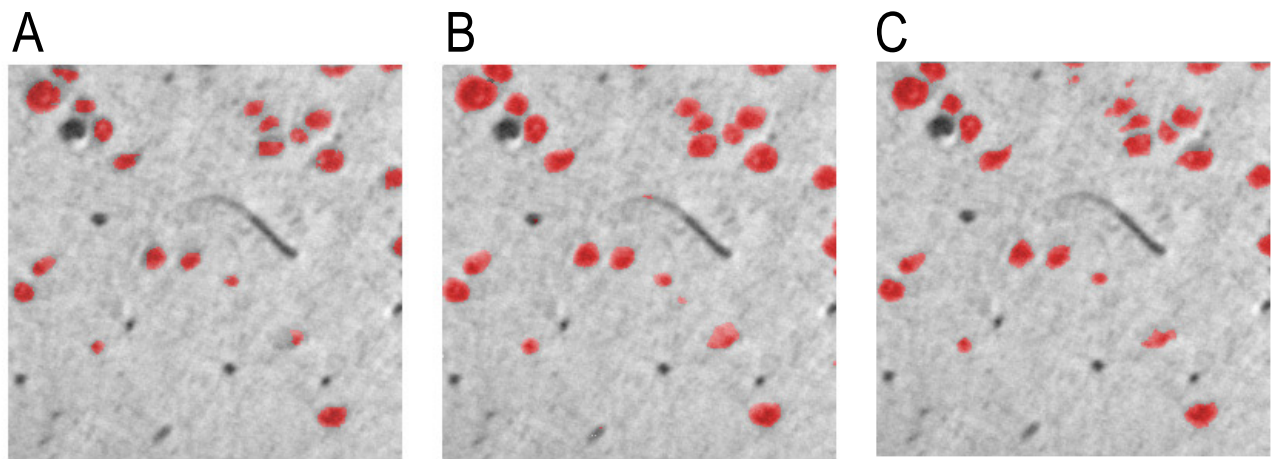

**Supplementary Figure S 3.** A comparison of SRB (A) manual annotations, (B) 3D U-Net cell segmentation, and (C) 3D FLoRIN cell segmentation. In general, 3D U-Net tends to over-segment the cells, incurring merge errors with nearby cells and on correctly identifying a vasculature segment as a cell. 3D FLoRIN, on the other hand, clearly separates grouped cells and does not misclassify vasculature.

**Data:** img: an n-dimensional image to threshold  
**Data:** n: the dimensionality of img  
**Data:** d: an n-tuple containing the size of each dimension of img  
**Data:** s: an n-tuple containing the dimensions of the box around each pixel  
**Data:** t: the threshold value to use, number in range [0, 1]  
**Result:** binarization of img  
let out be an array the same size as img;  
intImg = img;  
**for**  $i$  in  $1..n$  **do**  
    // Compute the cumulative summation over dimension  $i$   
    intImg = cumulativeSummation(intImg,  $i$ );  
**end**  
let *indices* be the set of all binary strings length  $n$ ;  
let *low*, *hi*, *vertex* be length  $n$  arrays filled with zeros;  
parity =  $n \bmod 2$ ;  
**foreach** *element*  $e$  in *intImg* **do**  
     $x = \text{index}(\text{intImg}, e)$ ;  
    **for**  $i$  in  $1..n$  **do**  
         $\text{low}[i] = x[i] - s[i] / 2$ ;  
         $\text{hi}[i] = x[i] + s[i] / 2$ ;  
        **if**  $\text{low}[i] < 1$  **then**  
             $\text{low}[i] = 0$ ;  
        **end**  
        **if**  $\text{hi}[i] > d[i]$  **then**  
             $\text{hi}[i] = d[i]$ ;  
        **end**  
    **end**  
     $\text{count} = \prod_{i=1}^n \text{hi}[i] - \text{low}[i]$ ;  
     $\text{sum} = 0$ ;  
    **foreach** *idx* in *indices* **do**  
         $p = 0$ ;  
        **for**  $i$  in  $1..n$  **do**  
             $p = p + \text{idx}[i]$ ;  
            **if**  $\text{idx}[i] = 1$  **then**  
                 $\text{vertex}[i] = \text{hi}[i]$ ;  
            **else**  
                 $\text{vertex}[i] = \text{low}[i]$ ;  
            **end**  
        **end**  
         $p = p \bmod 2$ ;  
        **if**  $p = \text{parity}$  **then**  
             $\text{sum} = \text{sum} + \text{intImg}[\text{vertex}]$ ;  
        **else**  
             $\text{sum} = \text{sum} - \text{intImg}[\text{vertex}]$ ;  
        **end**  
    **end**  
    **if**  $\text{img}[x] \times \text{count} \leq \text{sum} \times (1.0 - t)$  **then**  
         $\text{out}[x] = 0$ ;  
    **else**  
         $\text{out}[x] = 1$ ;  
    **end**  
**end**  
**return** *out*

**Algorithm 1:** Local Adaptive Thresholding
